# Supplementary material for: Covalent pendulous anthraquinone polymers coupled on graphenes for efficient capacitance storage in both alkaline and acidic media
Source: Royal Society of Chemistry journal article supplement (doi:10.1039/d0dt02279a), 2020-01-01
Supplement: d0dt02279a1.pdf [file d0dt02279a1.pdf]

**Electronic Supplementary Information(ESI)**

Covalent pendulous anthraquinone polymers coupled on graphenes for efficient capacitor storage in both alkaline and acidic media

*Tingting Cheng, Yuelin Jiang, Linhui Jin, Aiguo Kong\* and Yongkui Shan*

*School of Chemistry and Molecular Engineering, East China Normal University, Shanghai, 200241, China*

E-mail: [agkong@chem.ecnu.edu.cn](mailto:agkong@chem.ecnu.edu.cn)

## CONTENTS

**Figure S1.** Synthesis of TPDA@NH<sub>2</sub>-rGO,TPDAB@NH<sub>2</sub>-rGO and TADA@NH<sub>2</sub>- rGO.

**Figure S2.** (A)The extended structure of TPDA; (B) pore size distribution curves of TPDA @NH<sub>2</sub>-rGO.

**Figure S3.** (A) XRD patterns of TPDAB @NH<sub>2</sub>-rGO; (B) XRD patterns of TADA@NH<sub>2</sub>-rGO; (C) The FT-IR spectra of TPDAB @NH<sub>2</sub>-rGO; (D) The FT-IR spectra of TADA@NH<sub>2</sub>-rGO.

**Figure S4.** (A), (B), (C), (D) TEM images of TPDA; (E) ,(F) SEM of TPDA@NH<sub>2</sub>-rGO.

**Figure S5.** Electrochemical performances measured in 6.0 M KOH. (A) Specific capacitances of TPDA@ NH<sub>2</sub>-rGO at different current densities; (B) Plot for the cyclic performance test of TPDA@NH<sub>2</sub>-rGO; (C) CV curves of TPDA @ NH<sub>2</sub>-rGO and NH<sub>2</sub>-rGO at 50 mV·s<sup>-1</sup>; (D) GCD curves of TPDA @ NH<sub>2</sub>-rGO and NH<sub>2</sub>-rGO at 0.2 A·g<sup>-1</sup>.

**Figure S6.** Electrochemical performances measured in 6.0 M KOH. (A) CV curves of different COPs at 50 mV·s<sup>-1</sup>; (B) GCD curves of different COPs at 0.2 A·g<sup>-1</sup>; (C) CV curves of TPDA @ NH<sub>2</sub>-rGO with different NH<sub>2</sub>-rGO at 50 mV·s<sup>-1</sup>; (D) GCD curves of TPDA@ NH<sub>2</sub>-rGO with different NH<sub>2</sub>-rGO at 0.2 A·g<sup>-1</sup>.

**Figure S7.** (A) Initial state of electrode surface; (B) The electrode surface after GCD test for 3 hours; (C) The electrode surface after GCD test for 6 hours.

**Figure S8.** (A) N<sub>2</sub>-sorption isotherm of TADA@NH<sub>2</sub>-rGO; (B) Pore size distribution curves of TADA @NH<sub>2</sub>- rGO.

**Figure S9.** Nyquist plot of TADA@NH<sub>2</sub>-rGO and TPDA@NH<sub>2</sub>-rGO.

**Figure S10.** (A) Plot for the cyclic performance test of NH<sub>2</sub>-rGO for 2000 cycles; (B) Plot for the cyclic performance test of TPDA for 2000 cycles.

**Table S1.** Comparison of specific capacitance of TPDA@NH<sub>2</sub>-rGO with other porous materials and carbon materials.

**Table S2.** The values of equivalent circuit parameters calculated from EIS result for TPDA@NH<sub>2</sub>-rGO.

**Table S3.** Comparison of specific capacitance of TPDA@NH<sub>2</sub>-rGO with different content of NH<sub>2</sub>-rGO.

**Figure S1.** Synthesis of TPDA@NH<sub>2</sub>-rGO,TPDAB@NH<sub>2</sub>-rGO and TADA@NH<sub>2</sub>- rGO

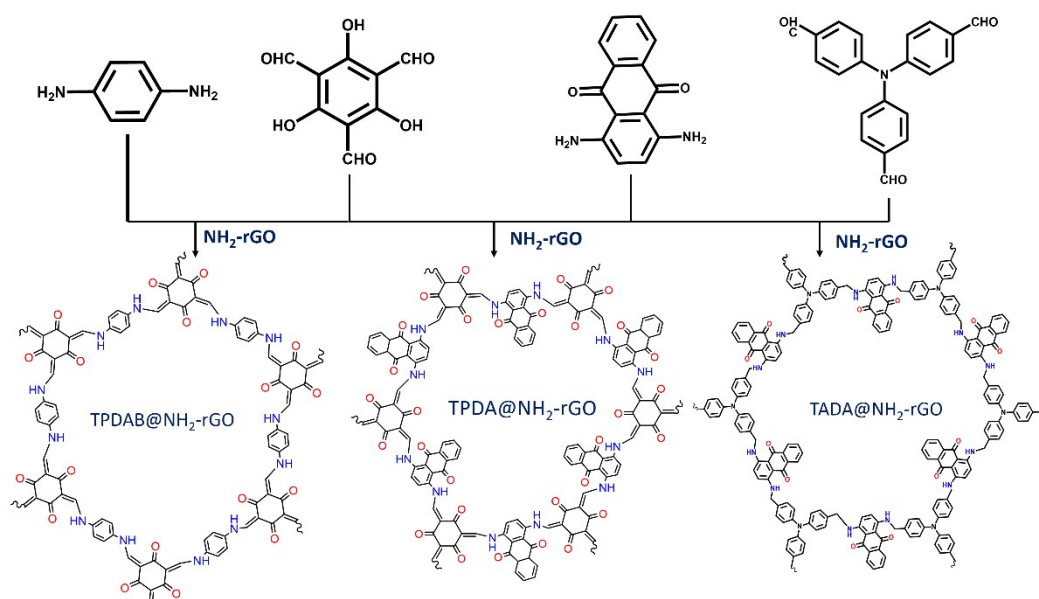

**Figure S2.** (A) The extended structure of TPDA; (B) Pore size distribution curves of TPDA @NH<sub>2</sub>-rGO

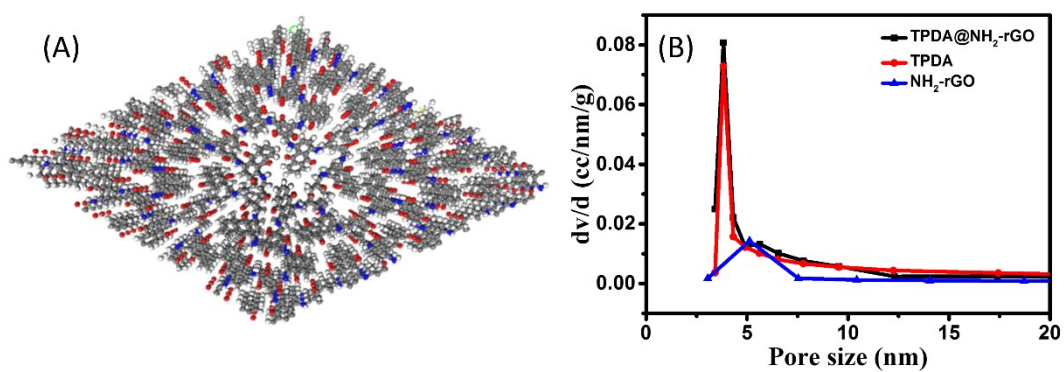

**Figure S3.** (A) XRD patterns of TPDAB @NH<sub>2</sub>-rGO; (B) XRD patterns of TADA@NH<sub>2</sub>-rGO; (C) The FT-IR spectra of TPDAB @NH<sub>2</sub>-rGO; (D) The FT-IR spectra of TADA@NH<sub>2</sub>-rGO.

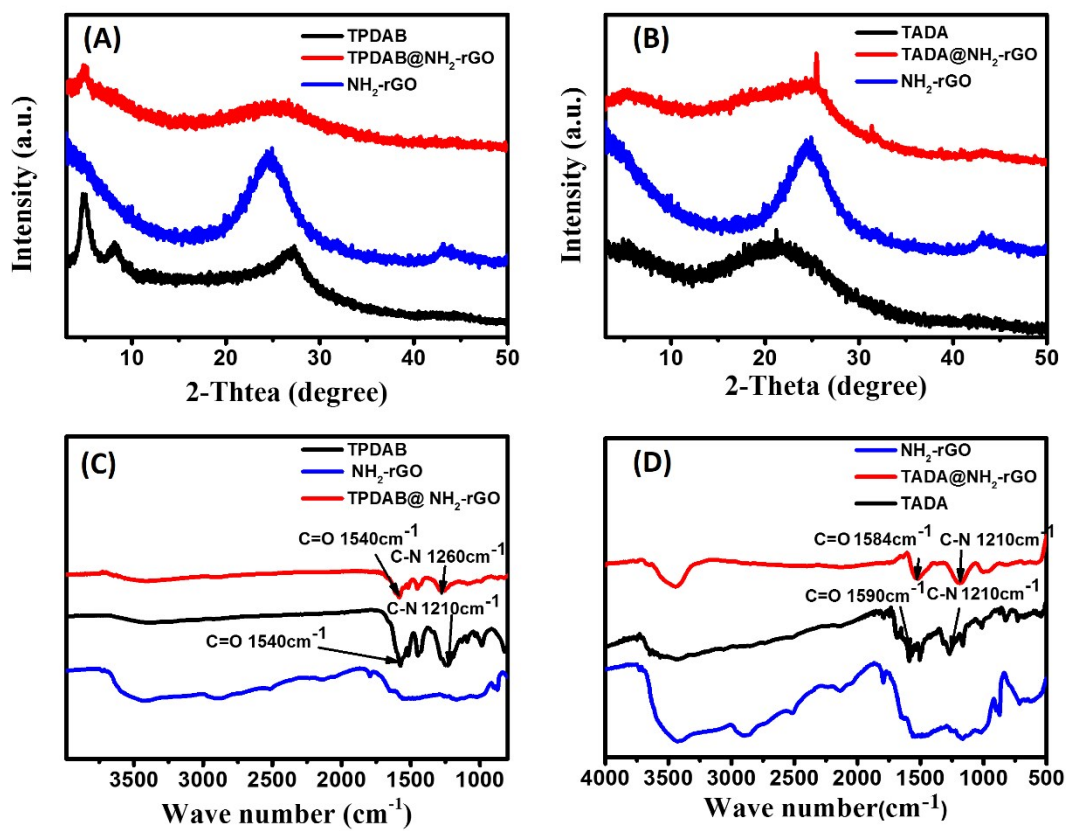

**Figure S4.** (A), (B), (C), (D) TEM images of TPDA; (E), (F) SEM of TPDA@NH<sub>2</sub>-rGO.

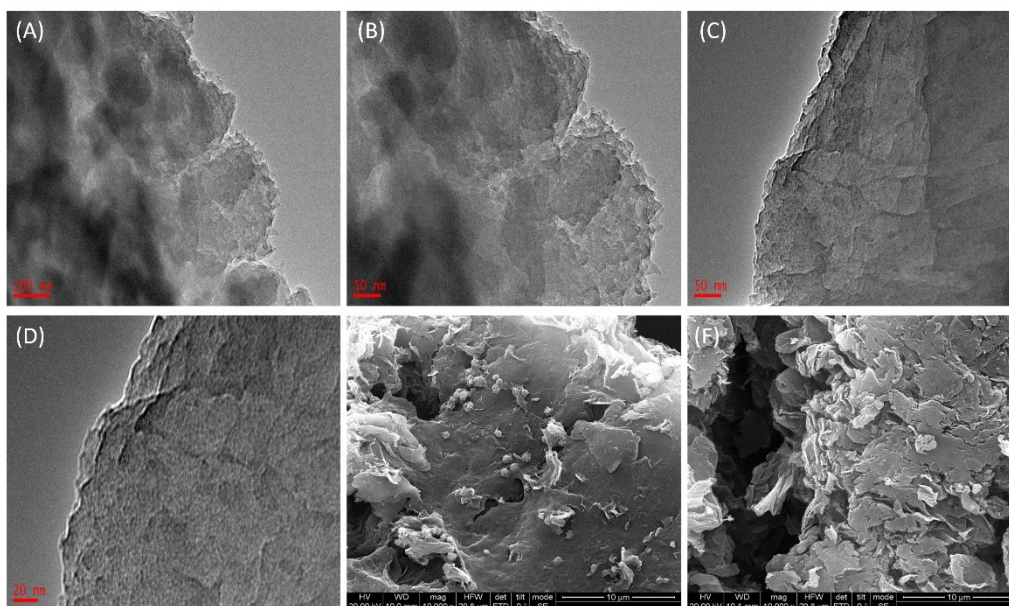

**Figure S5.** Electrochemical performances measured in 6.0 M KOH. (A) Specific capacitances of TPDA@NH<sub>2</sub>-rGO at different current densities; (B) Plot for the cyclic performance test of TPDA@NH<sub>2</sub>-rGO; (C) CV curves of TPDA@NH<sub>2</sub>-rGO and NH<sub>2</sub>-rGO at 50 mV·s<sup>-1</sup>; (D) GCD curves of TPDA@NH<sub>2</sub>-rGO and NH<sub>2</sub>-rGO at 0.2 A·g<sup>-1</sup>.

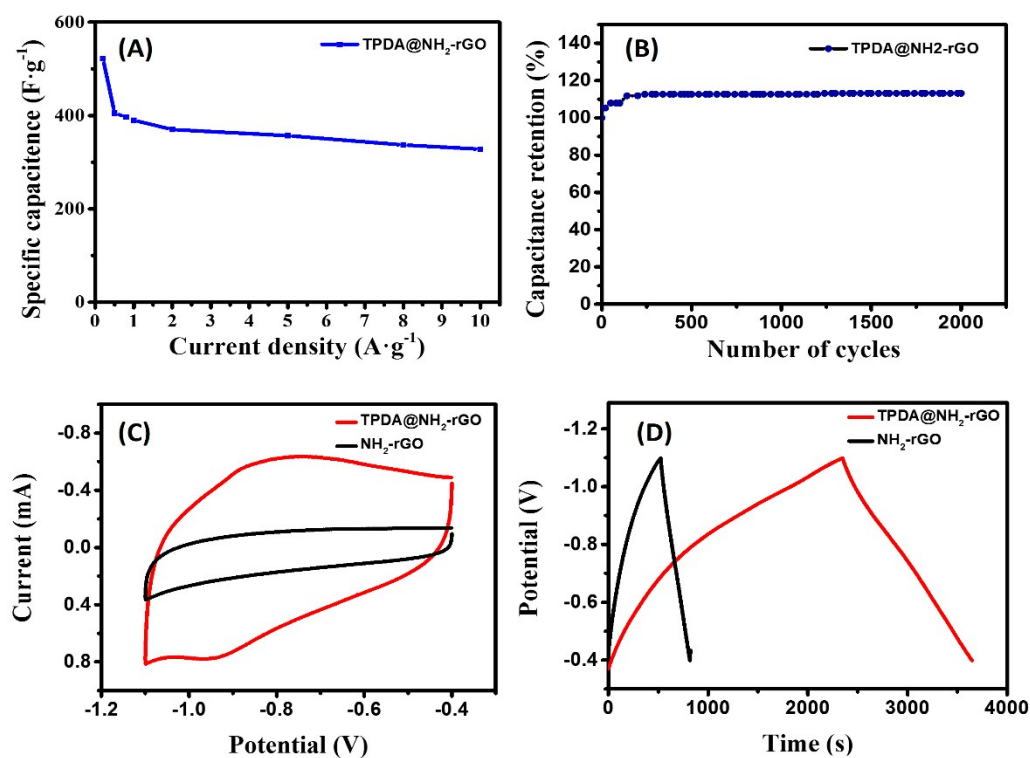

**Figure S6.** Electrochemical performances measured in 6.0 M KOH. (A) CV curves of different COPs at  $50 \text{ mV}\cdot\text{s}^{-1}$ ; (B) GCD curves of different COPs at  $0.2 \text{ A}\cdot\text{g}^{-1}$ ; (C) CV curves of TPDA @  $\text{NH}_2$ -rGO with different  $\text{NH}_2$ -rGO at  $50 \text{ mV}\cdot\text{s}^{-1}$ ; (D) GCD curves of TPDA@  $\text{NH}_2$ -rGO with different  $\text{NH}_2$ -rGO at  $0.2 \text{ A}\cdot\text{g}^{-1}$ .

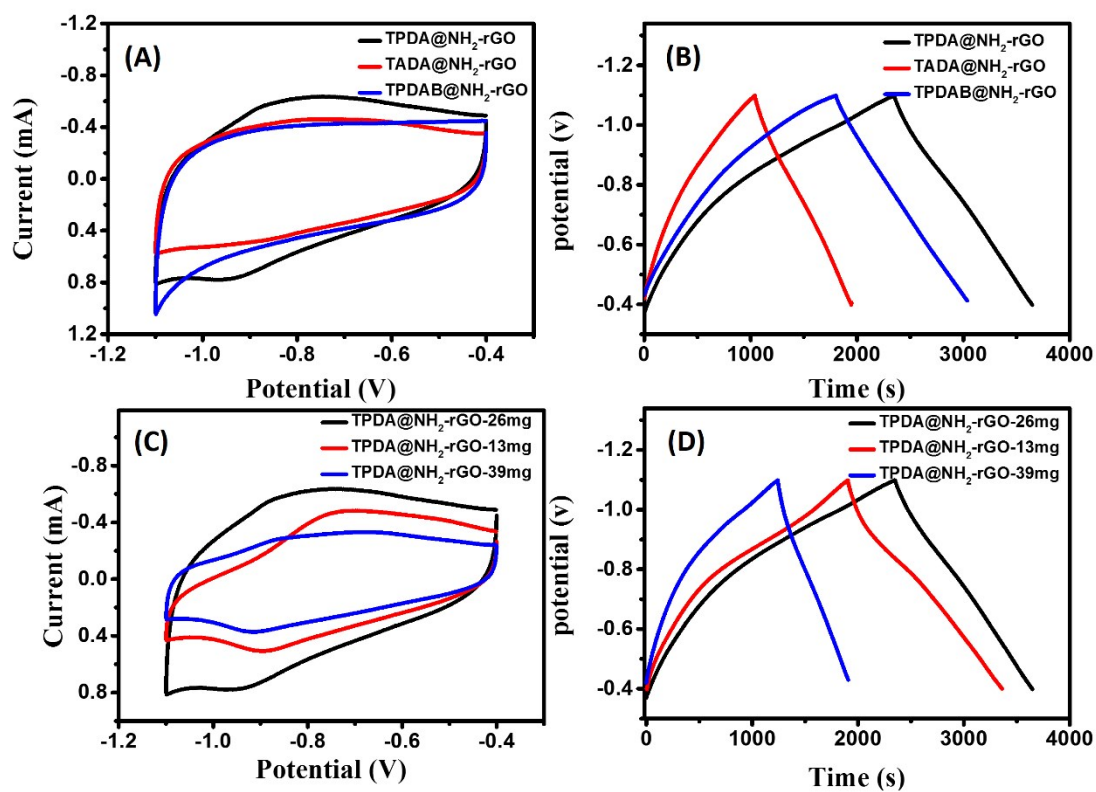

**Figure S7.** (A) Initial state of electrode surface; (B) The electrode surface after GCD test for 3 hours; (C) The electrode surface after GCD test for 6 hours

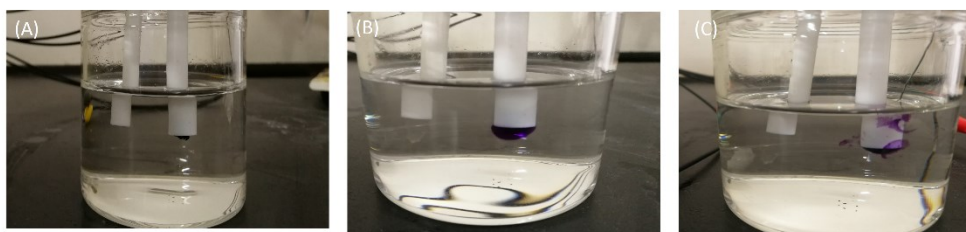

**Figure S8.** (A)  $N_2$ -sorption isotherm of TADA@NH<sub>2</sub>-rGO; (B) Pore size distribution curves of TADA @NH<sub>2</sub>- rGO;

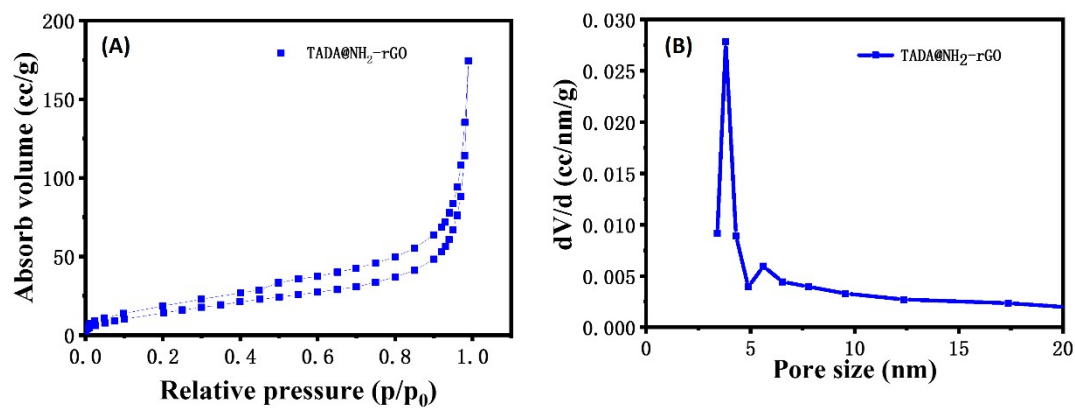

**Figure S9.** Nyquist plot of TADA@NH<sub>2</sub>-rGO and TPDA@NH<sub>2</sub>-rGO

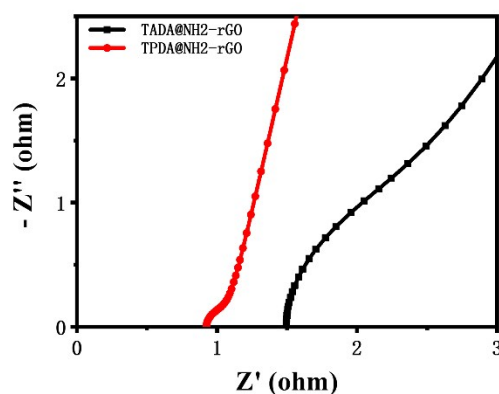

**Figure S10.** (A) Plot for the cyclic performance test of NH<sub>2</sub>-rGO for 2000 cycles; (B) Plot for the cyclic performance test of TPDA for 2000 cycles.

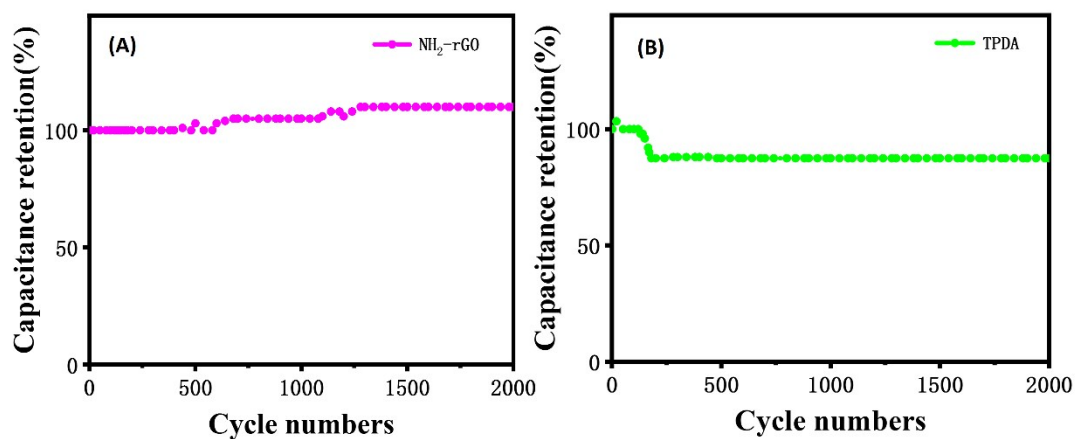



**Table S1.** Comparison of specific capacitance of TPDA@NH<sub>2</sub>-rGO with other porous materials and carbon materials

| Electrode materials                 | Electrolyte                                     | Specific Capacitance (F·g <sup>-1</sup> ) | Reference |
|-------------------------------------|-------------------------------------------------|-------------------------------------------|-----------|
| TPDA@NH <sub>2</sub> -rGO           | 2 M H <sub>2</sub> SO <sub>4</sub>              | 522                                       | This work |
| TPDA@NH <sub>2</sub> -rGO           | 6 M KOH                                         | 390                                       | This work |
| N-rich composite of CNTs            | 1 M H <sub>2</sub> SO <sub>4</sub>              | 167                                       | S1        |
| amoxidized coals                    | 7 M KOH                                         | 145                                       | S2        |
| N-enriched nanostructured carbons   | 1 M H <sub>2</sub> SO <sub>4</sub>              | 201                                       | S3        |
| CNTs/N-enriched carbon              | 1 M H <sub>2</sub> SO <sub>4</sub>              | 100                                       | S4        |
| N-enriched carbon from melaminemica | 6 M KOH                                         | 198                                       | S5        |
| nitrogen-doped porous nanofibers    | 6 M KOH                                         | 202                                       | S6        |
| TPDAB based (Pristine CPF)          | Na <sub>2</sub> SO <sub>4</sub> (not mentioned) | 432                                       | S7        |
| TPDA-1 (Pristine POP)               | 1 M H <sub>2</sub> SO <sub>4</sub>              | 348                                       | S8        |
| TAT-CMP-2 (Pristine POP)            | 1M Na <sub>2</sub> SO <sub>4</sub>              | 183                                       | S9        |
| CMP-based hollow                    | H <sub>2</sub> SO <sub>4</sub> (not mentioned)  | 286                                       | S10       |
| NPC-800                             | 5 M KOH                                         | 230                                       | S11       |
| 3D HLPC                             | 6 M KOH                                         | 342                                       | S12       |
| Nitrogen-rich GMP                   | 6 M KOH                                         | 273                                       | S13       |
| TaPa-Py COF                         | 1 M H <sub>2</sub> SO <sub>4</sub>              | 209                                       | S14       |
| oxygen functionalized graphene      | 2 M H <sub>2</sub> SO <sub>4</sub>              | 296                                       | S15       |
| Reduced graphene                    | 2 M H <sub>2</sub> SO <sub>4</sub>              | 163                                       | S16       |

**Table S2.** The values of equivalent circuit parameters calculated from EIS result for TPDA@NH<sub>2</sub>-rGO.

|                           | TPDA @NH <sub>2</sub> -rGO | TPDA    | NH <sub>2</sub> -rGO |
|---------------------------|----------------------------|---------|----------------------|
| R <sub>s</sub> (Ω)        | 0.9248                     | 2.042   | 0.8541               |
| C <sub>dl</sub> (mF)      | 1.074                      | 0.168   | 0.5324               |
| R <sub>ct</sub> (Ω)       | 0.2641                     | 1.706   | 0.1481               |
| Q (F·s <sup>(a-1)</sup> ) | 0.008317                   | 0.03291 | 0.01165              |
| a                         | 0.8                        | 0.8317  | 0.6973               |

**Table S3.** Comparison of specific capacitance of TPDA@NH<sub>2</sub>-rGO with different content of NH<sub>2</sub>-rGO.

| Electrolyte                        | TPDA@NH <sub>2</sub> -rGO-13mg (F·g <sup>-1</sup> ) | TPDA@NH <sub>2</sub> -rGO-26mg (F·g <sup>-1</sup> ) | TPDA@NH <sub>2</sub> -rGO-39mg (F·g <sup>-1</sup> ) |
|------------------------------------|-----------------------------------------------------|-----------------------------------------------------|-----------------------------------------------------|
| 2 M H <sub>2</sub> SO <sub>4</sub> | 268                                                 | 390                                                 | 175                                                 |
| 6 M KOH                            | 376                                                 | 522                                                 | 285                                                 |

## Reference

- S1. G. Lota, K. Lota and E. Frackowiak, *Electrochem. Commun.*, 2007, **9**, 1828-1832.
- S2. K. Jurewicz, K. Babel, A. Ziółkowski and H. Wachowska, *J. Phys. Chem. Solids*, 2004, **65**, 269-273.
- S3. E. Frackowiak, G. Lota, J. Machnikowski, C. Vix-Guterl and F. Béguin, *Electrochim. Acta*, 2006, **51**, 2209-2214.
- S4. F. Béguin, K. Szostak, G. Lota and E. Frackowiak, *Adv. Mater.*, 2005, **17**, 2380-2384.
- S5. D. Hulicova-Jurcakova, M. Kodama, S. Shiraishi, H. Hatori, Z. H. Zhu and G. Q. Lu, *Adv. Funct. Mater.*, 2009, **19**, 1800-1809.
- S6. L. F. Chen, X. D. Zhang, H. W. Liang, M. Kong, Q. F. Guan, P. Chen, Z. Y. Wu and S. H. Yu, *ACS Nano*, 2012, **6**, 7092-7102.
- S7. B. C. Patra, S. Khilari, L. Satyanarayana, D. Pradhan and A. Bhaumik, *Chem. Commun.*, 2016, **52**, 7592-7595.
- S8. P. Bhanja, S. K. Das, K. Bhunia, D. Pradhan, T. Hayashi, Y. Hijikata, S. Irle and A. Bhaumik, *ACS Sustain. Chem. Eng.*, 2018, **6**, 202-209.
- S9. X. C. Li, Y. Zhang, C. Y. Wang, Y. Wan, W. Y. Lai, H. Pang and W. Huang, *Chem. Sci*, 2017, **8**, 2959-2965.
- S10. J. Lee, J. Choi, D. Kang, Y. Myung, S. M. Lee, H. J. Kim, Y. J. Ko, S. K. Kim and S. U. Son, *ACS Sustain. Chem. Eng.*, 2018, **6**, 3525-3532.
- S11. X. Liu, L. Zhou, Y. Zhao, L. Bian, X. Feng and Q. Pu, *ACS Appl. Mater. Inter.*, 2013, **5**, 10280-10287.
- S12. Q. Liang, L. Ye, Z. Huang, Q. Xu, Y. Bai, F. Kang and Q. Yang, *Nanoscale*, 2014, **6**, 13831-13837.
- S13. K. Yuan, T. Hu, Y. Xu, R. Graf, L. Shi, M. Forster, T. Pichler, T. Riedl, Y. Chen and U. Scherf, *Mater. Chem. Front.*, 2017, **1**, 278-285.
- S14. A. M. Khattak, Z. A. Ghazi, B. Liang, N. A. Khan, A. Iqbal, L. Li and Z. Tang, *J. Mater. Chem. A*, 2016, **4**, 16312-16317.
- S15. C. Singh, N. S., A. Jana, A. K. Mishra and A. Paul, *Chem. Commun*, 2016, **52**, 13179.
- S16. C. Singh, A. K. Mishra and A. Paul, *J. Mater. Chem. A* 2015, **3**, 18557-18563.
